# Supplementary material
Source: publisher site journal article supplement (https://www.dovepress.com/get_supplementary_file.php?f=426703.docx)
Supplement: Supplementary file 1 [file get_supplementary_file.php]

**Supplement Figure captions:**

**Supplement Figure 1.** Tg of NOB/SD in different formulations.


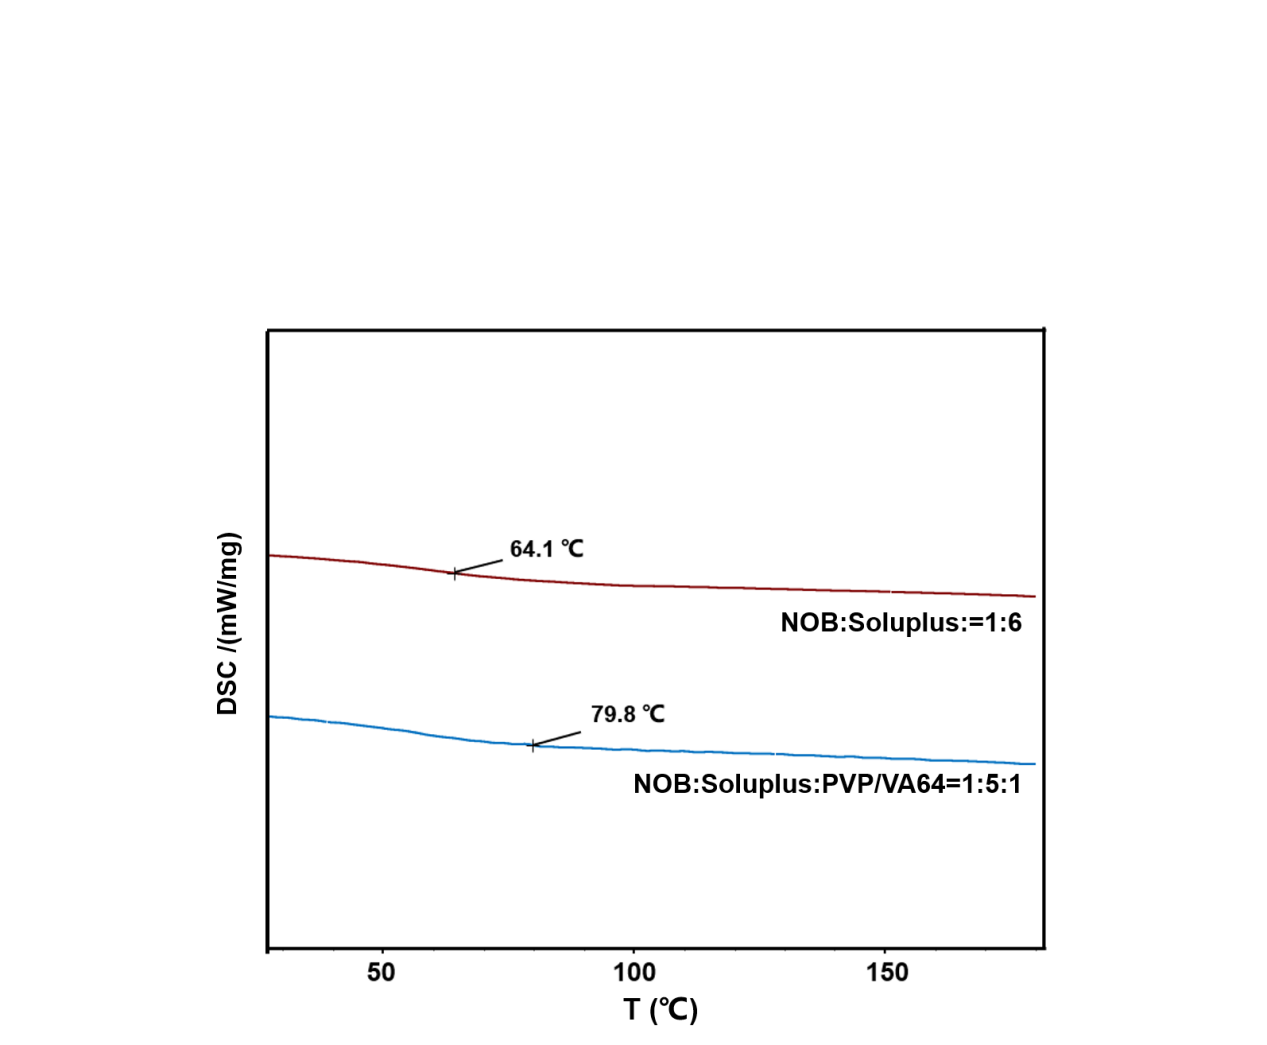


**Supplement Figure 1.** Tg of NOB/SD in different formulations.
